# Supplementary material
Source: PubMed Central journal article supplement (PMC6269289)
Supplement: 2018_198028-Disclosures_and_Contributions.pdf [file 2018_198028-Disclosures_and_Contributions.pdf]

Haematologica  
HAEMATOL/2018/198028  
Version 4

A mutation in the gene coding for the sialic acid transporter SLC35A1 is required for platelet life span but not proplatelet formation

Alexandre Kauskot, Tiffany Pascreau, Frédéric Adam, Arnaud Bruneel, Christelle Reperant, Marc-Damien Lourenco-Rodrigues, Jean-Philippe Rosa, Rachel Petermann, Hélène Maurey, Claire Auditeau, Dominique Lasne, Cécile V. Denis, Marijke Bryckaert, Pascale de Lonlay, Cécile Lavenu-Bombled, Judith Melki, and Delphine Borgel

Disclosures: 'none'

Contributions: AK: performed research, data analysis, wrote the manuscript TP: performed research, data analysis FA: wrote the manuscript AB: performed research, data analysis, wrote the manuscript CR: performed research MDLR: performed research JPR: data analysis, wrote the manuscript RP: performed research HM: provided patient clinical data CA: performed research, data analysis DL: performed research, data analysis CVD: data analysis MB: data analysis, wrote the manuscript PDL: provided patient clinical data and access to patient samples CLB: provided patient clinical data and access to patient samples JM: performed research, data analysis, wrote the manuscript DB: data analysis, wrote the manuscript, supervised the study
